# Supplementary material
Source: MDPI journal article supplement (https://www.mdpi.com/2072-4292/15/10/2627)
Supplement: s1 [file s1]

## Supplemental Materials

Suppl. Table S1: Recent research studies related to development of early warning metrics of drought-induced stress and mortality in forests using remote sensing-based data

| Variable                                               | Data / EO Data                                                                                                                                   | Forest type                                                                                                      | Study Area                                      | Citation               |
|--------------------------------------------------------|--------------------------------------------------------------------------------------------------------------------------------------------------|------------------------------------------------------------------------------------------------------------------|-------------------------------------------------|------------------------|
| Microwave Temperature–Vegetation Drought Index (MTVDI) | Advanced Microwave Scanning Radiometer for the Earth Observing System (AMSR-E)/Aqua ascending daily global 0.25-degree terabyte data, MODIS data | Tropical evergreen forest                                                                                        | Amazon basin                                    | Liu et al., 2021       |
| Forest Drought Response Index (ForDRI)                 | MODIS                                                                                                                                            | More than 80 tree species, dominated by Oak/Hickory, Loblolly/Shortleaf pine, and Maple/Beech/Birch type groups. | Eastern U.S.                                    | Tadesse et al., 2020   |
| GNDVI, NDVI and NIRv                                   | Vegetation indices NDVI, GNDVI and NIRv detected by NIR-camera                                                                                   | Quercus species: <i>Q. robur</i> L., <i>Q. pubescens</i> Willd., and <i>Q. ilex</i> L.                           | Nursery greenhouse, Pistoia, Italy              | Raddi et al., 2021     |
| NPV                                                    | Landsat TM and ETM+                                                                                                                              | Aspen Forest                                                                                                     | San Juan National Forest, Western Colorado, USA | Anderegg et al., 2019a |
| NDVI                                                   | NOAA AVHRR - GIMMS data                                                                                                                          | Conifer forest, deciduous forest, mixed coniferous and deciduous forest and tundra                               | Boreal North America                            | Goetz et al., 2005     |
| NDVI                                                   | AVHRR - GIMMS, SPOT-VGT and MODIS                                                                                                                | Multiple vegetation types                                                                                        | Tibetan Plateau, China                          | Liu et al., 2019       |
| NDVI                                                   | MODIS                                                                                                                                            | Multiple species                                                                                                 | State of Texas, USA                             | Moore et al., 2016     |
| NDVI                                                   | AVHRR, MODIS and Landsat                                                                                                                         | White spruce, Alaska birch, Quaking aspen, Black spruce                                                          | Central-western boreal North America            | Rogers et al., 2018    |
| NDVI                                                   | Aerial Imagery - FireMapper 2.0, thermal-imaging radiometer and 2 Kodak MegaPlus 1.6i digital cameras mounted aboard a King Air A100 aircraft.   | Jeffrey pines                                                                                                    | Southern Sierra Nevada                          | Gulke et al., 2020     |
| NDVI, EVI, NDWI                                        | MODIS                                                                                                                                            | Oak-woodlands, chaparral, and conifers, mixed conifer forests                                                    | Southern and central Sierra Nevada region, USA  | Byer and Yufang, 2017  |

|                                                           |                                                                                                                                                      |                                                                                                                                                                              |                                                                |                                  |
|-----------------------------------------------------------|------------------------------------------------------------------------------------------------------------------------------------------------------|------------------------------------------------------------------------------------------------------------------------------------------------------------------------------|----------------------------------------------------------------|----------------------------------|
|                                                           |                                                                                                                                                      | with many species of pines and firs                                                                                                                                          |                                                                |                                  |
| NDVI, EVI and Normalized Difference Infrared Index (NDII) | ADS40 and MODIS                                                                                                                                      | <i>Pinus radiata</i> plantation                                                                                                                                              | Green Hills State Forest, New South Wales, Australia           | Verbesselt et al., 2009          |
| Elevation, Slope                                          | Demographic data and climatic data from Parameter-elevation Regression on Independent Slopes Model (PRISM)                                           | Temperate coniferous forests - several different forest types, including ponderosa pine-mixed conifer, white fir, mixed conifer, red fir, Jeffrey pine and subalpine forests | Sequoia and Yosemite national parks, Sierra Nevada, California | Van Mantgem and Stephenson, 2007 |
| Relative Water Content (RWC)                              | Aerial Detection and Monitoring Program data, Advanced Microwave Scanning Radiometer for Earth Observing System (AMSR-E) Radiometer 2 (AMSR-2) data. | Mixed conifers, western oak and pines                                                                                                                                        | California, USA                                                | Rao et al., 2019                 |
| Canopy Water Content (CWC), NDVI                          | High-fidelity imaging spectroscopy (HiFIS), Landsat and LiDAR data                                                                                   | Conifers                                                                                                                                                                     | Sierra Nevada mountains, California                            | Brodrick and Asner., 2017        |
| Multiple vegetation and water indices                     | Landsat, MODIS and NAIP (National Agriculture Imagery Program) orthophotos                                                                           | Ashe juniper, plateau live oak, post oak, cedar elm and honey mesquite                                                                                                       | Edwards Plateau and Llano Uplift regions of central Texas      | Schwantes et al., 2016           |

Suppl. Table S2. List of available UAV-compatible hyperspectral sensors and their specifications (BaySpec Inc., 2015; Cubert GmbH 2017; Fisher 2013a, b; MosaicMill Ltd 2017; Norsk Elektro Optikk AS ; Photonfocus ; Resonon Inc ; Specim ; Specim ; Ximea 2018a, b)

| Manufacturer            | Sensor                                         | Spectral Range (nm)           | No. of Bands              | Spectral Resolution (nm) | Spatial Pixels             | Acquisition Mode <sup>a</sup> | Weight (g)        |
|-------------------------|------------------------------------------------|-------------------------------|---------------------------|--------------------------|----------------------------|-------------------------------|-------------------|
| BaySpec                 | OCI-UAV-1000                                   | 600-1000                      | 100                       | < 5 <sup>b</sup>         | 2048 <sup>d</sup>          | P                             | 630 <sup>e</sup>  |
|                         | OCI-UAV-2000                                   | 600-1000                      | 20-25                     | 12 to 15 <sup>b</sup>    | 400 x 200                  | S                             | 6310 <sup>e</sup> |
|                         | OCI-D2000                                      | 475-975                       | 40                        | 12 to 15                 | 500 x 250                  | S                             | 540 <sup>f</sup>  |
| Brandywine Photonics    | CHAI S-640                                     | 825-2125                      | 260                       | 5 <sup>c</sup>           | 640 x 512                  | P                             | 5000              |
|                         | CHAI V-640                                     | 350-1080                      | 256                       | 2.5, 5, 10 <sup>c</sup>  | 640 x 512                  | P                             | 480               |
| Cubert GmbH             | S 185 - FirefIEYE SE                           | 450-950                       | 125                       | 4 <sup>c</sup>           | 50 x 50                    | S                             | 490               |
|                         | S 485 - FirefIEYE XL                           | 355-750; 550-1000;<br>450-950 | 125                       | 4.5 <sup>c</sup>         | 70 x 70                    | S                             | 1200              |
|                         | Q 285 - FirefIEYE QE                           | 450-950                       | 125                       | 4 <sup>c</sup>           | 50 x 50                    | S                             | 3000              |
| Headwall Photonics Inc. | Micro-Hyperspec VNIR A Series                  | 400-1000                      | 325                       | 5.8                      | 1004                       | P                             | 700 <sup>g</sup>  |
|                         | Micro-Hyperspec VNIR E Series                  | 400-1000                      | 369                       | 5.8                      | 1600                       | P                             | 1400 <sup>g</sup> |
|                         | Micro-Hyperspec NIR R640                       | 900-1700                      | 134                       | 10                       | 640                        | P                             | 900 <sup>g</sup>  |
|                         | Micro-Hyperspec NIR R320                       | 900-1700                      | 67                        | 10                       | 320                        | P                             | 900 <sup>g</sup>  |
|                         | Micro-Hyperspec Ext VNIR R640                  | 600-1700                      | 267                       | 5.5                      | 640                        | P                             | 900 <sup>g</sup>  |
|                         | Micro-Hyperspec SWIR M384                      | 900-2500                      | 166                       | 10                       | 384                        | P                             | 2000 <sup>g</sup> |
|                         | Micro-Hyperspec SWIR M640                      | 900-2500                      | 267                       | 8                        | 640                        | P                             | 1600 <sup>g</sup> |
|                         | Nano-Hyperspec                                 | 400-1000                      | 270                       | 6                        | 640                        | P                             | <520 <sup>g</sup> |
|                         | Hyperspec VNIR A Series                        | 380-1000                      | 837                       | 2.5 <sup>b</sup>         | 1004                       | P                             | 2800              |
|                         | Hyperspec VNIR E Series                        | 380-1000                      | 923                       | 2.5 <sup>b</sup>         | 1600                       | P                             | 3900              |
|                         | Hyperspec VNIR N Series                        | 380-1000                      | 775                       | 2.5 <sup>b</sup>         | 1004                       | P                             | 3700              |
|                         | Hyperspec UV-VIS                               | 250-500                       | 961                       | 1.4 <sup>b</sup>         | 1392                       | P                             | 3200              |
|                         | Hyperspec SWIR                                 | 900-2500                      | 267                       | 6.3 <sup>b</sup>         | 384                        | P                             | 4400              |
|                         | Hyperspec Co-Registered VNIR-SWIR <sup>h</sup> | 400-2500                      | 384 (VNIR),<br>166 (SWIR) | 5 (VNIR),<br>10 (SWIR)   | 1600 (VNIR),<br>384 (SWIR) | P                             | 11300             |
| HySpex                  | VNIR-1024                                      | 400-1000                      | 108                       | 5.4 <sup>c</sup>         | 1024                       | P                             | 4200              |
|                         | VNIR-1800                                      | 400-1000                      | 182                       | 3.26 <sup>c</sup>        | 1800                       | P                             | 5000              |
|                         | SWIR-384                                       | 1000-2500                     | 288                       | 5.45 <sup>c</sup>        | 384                        | P                             | 5700              |
|                         | Mjolnir V-1240                                 | 400-1000                      | 200                       | 3 <sup>c</sup>           | 1240                       | P                             | 4000              |
|                         | Mjolnir S-620                                  | 970-2500                      | 300                       | 5.1 <sup>c</sup>         | 620                        | P                             | 4500              |
| MosaicMill              | Rikola                                         | 500-900 <sup>i</sup>          | 50 <sup>j</sup>           | 10 <sup>b</sup>          | 1010 x 1010                | S                             | 720 <sup>k</sup>  |
| PhotonFocus             | MV0-D2048x1088-C01-HS02-160-G2                 | 600 to 975                    | 25                        | 15 <sup>b</sup>          | 2048 x 1088                | S                             | 75                |
|                         | MV0-D2048x1088-C01-HS03-160-G2                 | 470 to 630                    | 16                        | 15 <sup>b</sup>          | 2048 x 1088                | S                             | 75                |
|                         | MV1-D2048x1088-HS01-G2                         | 600 to 1000                   | 100                       | 10-12 <sup>b</sup>       | 2048 x 1088                | P                             | 265               |
|                         | MV1-D2048x1088-HS02-G2                         | 600 to 975                    | 25                        | 15 <sup>b</sup>          | 2048 x 1088                | S                             | 265               |
|                         | MV1-D2048x1088-HS03-G2                         | 470 to 630                    | 16                        | 15 <sup>b</sup>          | 2048 x 1088                | S                             | 265               |
|                         | MV1-D2048x1088-HS05-G2                         | 470 to 900                    | 150                       | 10-12 <sup>b</sup>       | 2049 x 1088                | P                             | 265               |
| Resonon                 | Pika NUV                                       | 350-800                       | 196                       | 2.3 <sup>b</sup>         | 1600                       | P                             | 2100              |
|                         | Pika L                                         | 400-1000                      | 281                       | 2.1 <sup>b</sup>         | 900                        | P                             | 600               |
|                         | Pika XC2                                       | 400-1000                      | 447                       | 1.3 <sup>b</sup>         | 1600                       | P                             | 2200              |
|                         | Pika NIR-320                                   | 900-1700                      | 164                       | 4.9 <sup>b</sup>         | 320                        | P                             | 2700              |
|                         | Pika NIR-640                                   | 900-1700                      | 328                       | 2.5 <sup>b</sup>         | 640                        | P                             | 2700              |

|        |                            |          |      |                   |          |   |        |
|--------|----------------------------|----------|------|-------------------|----------|---|--------|
| SPECIM | SPECIM FX10                | 400-1000 | 224  | 5.5 <sup>b</sup>  | 1024     | P | 1260   |
|        | SPECIM FX17                | 900-1700 | 224  | 8 <sup>b</sup>    | 640      | P | 1560   |
|        | AISA FENIX <sup>h</sup>    | 380-970  | 348  | 3.5               | 384      | P | <15000 |
|        |                            | 970-2500 | 274  | 12                | 384      |   |        |
|        | AISA FENIX 1K <sup>h</sup> | 380-970  | 348  | 4.5               | 1024     | P | 22500  |
|        |                            | 970-2500 | 256  | 14                | 1024     |   |        |
|        | AISA KESTREL 10            | 400-1000 | -    | 1.75 <sup>c</sup> | 2 040    | P | 4750   |
|        | AISA KESTREL 16            | 600-1640 | -    | 2.75 <sup>c</sup> | 640      | P | 5000   |
| Ximea  | MQ022HG-IM-LS100-NIR       | 600-975  | 100+ | 4                 | 2048 x 8 | P | 32     |
|        | MQ022HG-IM-LS150-VISNIR    | 470-900  | 150+ | 3                 | 2048 x 5 | P | 32     |

Note: <sup>a</sup> P – pushbroom, S – snapshot; <sup>b</sup> at FWHM; <sup>c</sup> by sampling; <sup>d</sup> Pushbroom length line (the other dimension depends on sweep distance); <sup>e</sup> with onboard computer; <sup>f</sup> with lens; <sup>g</sup> without lens; <sup>h</sup> suitable for medium-sized UAVs; <sup>i</sup> other ranges: 400-700, 450-800, 550-950; <sup>j</sup> 380 in the laboratory; <sup>k</sup> without battery, GPS and irradiance sensor

Suppl. Table S3. List of other available airborne hyperspectral sensors and their specifications (ASI 2018; BaySpec Inc. 2015; ESA 2018; ITRES Research Limited 2010a, b, 2012, 2014). This table provides an overview without claiming to be exhaustive.

| Owner/ Developer/<br>Manufacturer   | Sensor                                                           | Spectral Range<br>(nm)                                | No. of Bands                          | Spectral<br>Resolution (nm)                   | Spatial Resolution<br>(m) | Spatial<br>pixels | Weight<br>(kg)  | Scanning<br>Mechanism <sup>a</sup> |
|-------------------------------------|------------------------------------------------------------------|-------------------------------------------------------|---------------------------------------|-----------------------------------------------|---------------------------|-------------------|-----------------|------------------------------------|
| NASA/JPL                            | AVIRIS<br>(Airborne<br>Visible/Infrared Imaging<br>Spectrometer) | 360 - 670<br>660 - 1280<br>1260 - 1880<br>1880 - 2500 | 32<br>64<br>64<br>64                  | 9.5-10 <sup>b</sup>                           | 20 <sup>e</sup>           | 677               | 340             | W                                  |
| ESA and Swiss-Belgian<br>Consortium | APEX<br>(Airborne PRISM<br>Experiment)                           | 380-970 (VNIR)<br>940-2500 (SWIR)                     | 114 (VNIR) <sup>d</sup><br>199 (SWIR) | 0.6-6.3 (VNIR),<br>13.5-7 (SWIR) <sup>b</sup> | -                         | 1024              | -               | P                                  |
| NASA/JPL and NASA/IIP               | HyTES<br>(Hyperspectral Thermal<br>Emission<br>Spectrometer)     | 7500-12000                                            | 256                                   | 17.6 <sup>c</sup>                             | 36.4 <sup>e</sup>         | 512               | 12 <sup>f</sup> | P                                  |
| ITRES                               | CASI1500h                                                        | 380-1050                                              | 288                                   | <3.5 <sup>b</sup>                             | 0.3-1.5 <sup>g</sup>      | 1500              | 51 <sup>h</sup> | P                                  |
|                                     | SASI1000A                                                        | 950-2450                                              | 200                                   | 7.5 <sup>b</sup>                              | 0.5-2 <sup>g</sup>        | 1000              | 51 <sup>h</sup> | P                                  |
|                                     | MASI600                                                          | 3000-5000                                             | 64                                    | 32 <sup>b</sup>                               | 1-3.5 <sup>g</sup>        | 600               | -               | P                                  |
|                                     | TASI600                                                          | 8000-11500                                            | 32                                    | 110 <sup>c</sup>                              | 1-3.5 <sup>g</sup>        | 600               | 66 <sup>h</sup> | P                                  |

Note: <sup>a</sup> W – whiskbroom, P – pushbroom; <sup>b</sup> at FWHM; <sup>c</sup> by sampling; <sup>d</sup> can be extended up to 334 depending on binning; <sup>e</sup> at 20 km altitude; <sup>f</sup> does not include 1 rack of electronics to operate; <sup>g</sup> depending on flight altitude; <sup>h</sup> weight of SHU, ICU and display

Suppl. Table S4. List of decommissioned or inactive satellite missions carrying hyperspectral sensors and their specifications (ESA 2018; HSFL ; NRSC-ISRO ; Symbios 2018; USGS)

| Satellite                                                                   | Country | Operational Lifetime <sup>a</sup> | Design Life             | Hyperspectral Sensor                                                                            | Spatial Resolution (m) | Swath Width (km) | Spectral Range (nm)                                             | Spectral Resolution (nm) | Spectral Bands                                | Revisit (days) | Data Access                                                                                                   |
|-----------------------------------------------------------------------------|---------|-----------------------------------|-------------------------|-------------------------------------------------------------------------------------------------|------------------------|------------------|-----------------------------------------------------------------|--------------------------|-----------------------------------------------|----------------|---------------------------------------------------------------------------------------------------------------|
| EO-1<br>(Earth Observing-1)                                                 | USA     | 2000-2017                         | 1.5 years<br>(exceeded) | Hyperion                                                                                        | 30                     | 7.5              | 400-1000<br>(VNIR),<br>900-2500<br>(SWIR)                       | 10                       | 220                                           | 16             | Historical data<br>available in Earth<br>Explorer and GloVis                                                  |
| OrbView-4<br>minisatellite                                                  | USA     | 2001                              | 5                       | OHIS<br>(OrbView<br>Hyperspectral<br>Imaging System)                                            | 8                      | 5 x 20           | 450-905<br>(VNIR),<br>830-1740<br>(NIR),<br>1580-2490<br>(SWIR) | 11.4                     | 40<br>(VNIR),<br>80<br>(NIR),<br>80<br>(SWIR) | 3              | No data due to launch<br>failure                                                                              |
| IMS-1 or TWSat<br>(Indian Microsatellite-<br>1 or Third World<br>Satellite) | India   | 2008-2013                         | 2 years<br>(exceeded)   | HySI<br>(Hyper-Spectral<br>Imager)                                                              | 505.6                  | 130              | 400-950                                                         | < 15                     | 64                                            | 24             | Historical data within<br>the Indian region<br>available in NRSC<br>under the Indian Geo-<br>Platform of ISRO |
| TacSat-3 (Tactical<br>Satellite-3<br>minisatellite)                         | USA     | 2009-2012                         | 6 months<br>(exceeded)  | ARTEMIS<br>(Advanced<br>Responsive<br>Tactically Effective<br>Military Imaging<br>Spectrometer) | -                      |                  | 400-2500                                                        | 5 <sup>b</sup>           | 400+                                          | -              | Inaccessible due to<br>military nature of the<br>mission                                                      |
| HS-1<br>(HiakaSat <sup>c</sup><br>microsatellite)                           | USA     | 2015                              | 6 months                | SUCHI<br>(Space Ultra-<br>compact<br>Hyperspectral<br>Imager)                                   | 230                    | 59 x 230         | 8500-13000                                                      | -                        | 7                                             | -              | No data due to launch<br>failure                                                                              |

Note: <sup>a</sup> starting from the year of launch; <sup>b</sup> spectral sampling; <sup>c</sup> originally called the HawaiiSat-1 mission but officially carried by the Operationally Responsive Space-4 (ORS-4) mission

Suppl. Table S5. List of launched, operational and planned satellite missions carrying hyperspectral sensors and their specifications (ESA 2018; NRSCC 2017; Satellite Imaging Corp. 2007; Satellogic). This table provides an overview without claiming to be exhaustive.

| Satellite                                                                   | Country              | Hyperspectral Sensor                                 | Spatial Resolution (m)            | Swath Width (km)            | Spectral Range (nm)                 | Spectral Resolution                                 | Spectral Bands | Revisit (days) | Data Provider/Access                                                                           |
|-----------------------------------------------------------------------------|----------------------|------------------------------------------------------|-----------------------------------|-----------------------------|-------------------------------------|-----------------------------------------------------|----------------|----------------|------------------------------------------------------------------------------------------------|
| Project for On-Board Autonomy-1 (PROBA-1)                                   | Belgium              | CHRIS (Compact High Resolution Imaging Spectrometer) | 17                                | 13                          | 400-1050                            | 1.25 nm                                             | 19             | 7              | Data available in ESA Earth Online                                                             |
| Aqua                                                                        | USA                  | AIRS (Atmospheric Infrared Sounder)                  | 13500 (IR),<br>2300 (VNIR)        | 1650 (IR),<br>40 (VNIR)     | 3740-15400 (IR),<br>410-490 (VNIR)  | 1200 $\lambda/\Delta\lambda$ (IR),<br>30-450 (VNIR) | 2378           | 16             | Data available in Goddard Earth Sciences Data and Information Services Center or GES DISC      |
| Resurs-Prospective 1-5 (Resurs-P 1-5)                                       | Russia               | GSA hyperspectral imager                             | 25-30                             | 30                          | 400-1100                            | 5-10 nm                                             | 96+            | 3              | Data available for order and tasking at Space Commercial Services Global Information or SCS Gi |
| Kent Ridge 1 microsatellite (KR1)                                           | Singapore w/ Germany | PPL1 and PPL2 (Primary Payload 1 and 2)              | 44 m (PPL1),<br>110 m (PPL2)      | 47.5 (PPL1),<br>56.3 (PPL2) | 500-900 (PPL1),<br>900-1500 (PPL2)  | -                                                   | 20-30          | -              | No available information                                                                       |
| Ñusat 1 (Fresco) and Ñusat 1 (Batata)                                       | Argentina            | -                                                    | 30                                | 150                         | 400-900                             | 5 nm                                                | 600            | -              | Data commercially available from Satellogic                                                    |
| Chinese Carbon Dioxide Observation Satellite Mission (TanSat minisatellite) | China                | CarbonSpec (Carbon Dioxide Spectrometer)             | 2000                              | 20                          | 758-778,<br>1594-1624,<br>2042-2082 | 0.044 nm,<br>0.12 nm,<br>0.16 nm                    | -              | 16             | Data available in National Remote Sensing Centre of China (NRSCC)                              |
| Gaofen 5 (GF-5)                                                             | China                | AHSI (Advanced Hyperspectral Imager)                 | No information available for AHSI |                             |                                     |                                                     |                |                |                                                                                                |
| GomSpace Express 4 cubesats (GOMX-4A and B)                                 | Denmark w/ ESA       | HyperScout                                           | 40                                | 164                         | 400-1000                            | -                                                   | 45             | 5              | No available information yet                                                                   |

Suppl. Table S5 cntd. List of launched, operational and planned satellite missions carrying hyperspectral sensors and their specifications (ASI 2018; Cotten et al. 2016; ESA 2018; Lee et al. 2015; Müller et al. 2012; NASA/JPL ; Symbios 2018; WMO 2011-2018).

| Satellite                                                    | Country         | Hyperspectral Sensor                                              | Spatial Resolution (m) | Swath Width (km) | Spectral Range (nm)                                                           | Spectral Resolution (nm)                          | Spectral Bands        | Revisit (days)               | Data Provider/Access                                                                                                                      |
|--------------------------------------------------------------|-----------------|-------------------------------------------------------------------|------------------------|------------------|-------------------------------------------------------------------------------|---------------------------------------------------|-----------------------|------------------------------|-------------------------------------------------------------------------------------------------------------------------------------------|
| Multi-User System for Earth Imaging platform (ISS MUSES)     | Germany and USA | DESI (DLR Earth Sensing Imaging Spectrometer)                     | 30                     | ~30              | 400-1000                                                                      | 2.55 <sup>b</sup>                                 | 235                   | Not indicated <sup>b</sup>   | Data to be distributed by Teledyne Technologies Inc. for commercial purposes and by German Aerospace Center (DLR) for scientific purposes |
| PRecursore IperSpettrale della Missione Applicativa (PRISMA) | Italy           | PRISMA                                                            | 30                     | 30               | 400-1010 (VNIR), 920-2505 (SWIR)                                              | ≤ 12                                              | 66 (VNIR), 171 (SWIR) | 29 & 7 <sup>c</sup>          | Data access description and product request are hosted by the PRISMA website (prisma-i.it)                                                |
| Spectral Ocean Color cubesat (SPOC)                          | USA             | Hyperspectral Imager                                              | 120                    | 75 x 300         | 400-900                                                                       | 2                                                 | 100                   | -                            | No available information yet.                                                                                                             |
| Advanced Land Observing Satellite-3 (ALOS-3)                 | Japan           | HSS in HISUI (Hyperspectral Sensor in Hyperspectral Imager Suite) | 30                     | 30               | 400-970 (VNIR), 900-2500 (SWIR)                                               | 10 (VNIR) <sup>a</sup> , 12.5 (SWIR) <sup>a</sup> | 57 (VNIR), 128 (SWIR) | 60                           | Data to be distributed through a network of several ALOS Data Nodes (ADN)                                                                 |
| GEO Imaging Satellite (GISAT)                                | India           | HyS-VNIR and HyS-SWIR (Hyperspectral VNIR imager and SWIR imager) | 320 (VNIR), 192 (SWIR) | -                | 400-870 (VNIR), 900-2500 (SWIR)                                               | < 10                                              | 60 (VNIR), 150 (SWIR) | 30 min the for Indian region | Data within the Indian region only                                                                                                        |
| Environmental Monitoring and Analysis Program (EnMAP)        | Germany         | HIS (Hyperspectral Imager)                                        | 30                     | 30               | 420-1000 (VNIR), 900-1390 (SWIR I), 1480-1760 (SWIR II), 1950-2450 (SWIR III) | 6.5 (VNIR) <sup>a</sup> , 10 (SWIR) <sup>a</sup>  | 96 (VNIR), 136 (SWIR) | 21 & 4 <sup>d</sup>          | To be linked to EnMAP Data Access Portal (EDAP)                                                                                           |
| Hyperspectral Infrared Imager (HyspIRI)                      | USA             | VSWIR Imaging Spectrometer                                        | 60                     | 185              | 380-2500                                                                      | 10                                                | ~ 200                 | 19                           | No available information yet.                                                                                                             |

<sup>a</sup> spectral sampling; <sup>b</sup> average time for the DESIS instrument to scan 90% of the populated Earth is 3-5 days; <sup>c</sup> repeat cycle and relook capability with roll manoeuvre, respectively; <sup>d</sup> repeat cycle and target revisit off nadir, respectively

## References

- Anderegg, W.R.; Anderegg, L.D.; Huang, C.Y. Testing early warning metrics for drought-induced tree physiological stress and mortality. *Glob. Chang. Biol.* 2019a, 25(7), 2459-2469. <https://doi.org/10.1111/gcb.14655>.
- ASI (2018). *PRISMA Mission Overview*. <http://prisma-i.it/index.php/en/mission/mission-overview> (accessed 25 May 2018)
- BaySpec Inc. *OCI™-D Airborne VIS-NIR Hyperspectral Imager*. <http://www.bayspec.com/spectroscopy/oci-uav-airborne-vis-nir-hyperspectral-imager/> (accessed 30 May 2018)
- BaySpec Inc. (2015). *OCI™-UAV Hyperspectral Camera*. <http://www.bayspec.com/wp-content/uploads/2015/09/BaySpec-Datasheet-OCI-UAV-Hyperspectral-Camera.pdf>
- Brodrick, P.G.; Asner, G.P. Remotely sensed predictors of conifer tree mortality during severe drought. *Environ. Res. Lett.* 2017, 12(11), 115013. <https://doi.org/10.1088/1748-9326/aa8f55>.
- Byer, S.; Yufang, J. Detecting drought-induced tree mortality in Sierra Nevada forests with time series of satellite data. *Re-mote Sens.* 2017, 9(9), 14-17. <https://doi.org/10.3390/rs9090929>.
- Cotten, D.L., Bernardes, S., Mishra, D., Adams, C., Neel, H., Ngo, K., LeCorre, M., Copenhaver, P., Ilango, N., King, A., Grable, G., & Hwang, P. (2016). The SPectral Ocean Color (SPOC) Small Satellite Mission: From Payload to Ground Station Development and Everything in Between. In, *AGU Fall Meeting*. San Francisco, California
- Cubert GmbH (2017). *Hyperspectral Sensors*. <http://cubert-gmbh.com/product-category/spectral-cameras/firefleye/> (accessed 30 May 2018)
- ESA (2018). *EO Portal Directory*. <https://directory.eoportal.org/web/eoportal/satellite-missions> (accessed 25 May 2018)
- Fisher, J. (2013a). *Compact Hyperspectral Advanced Imager for Visible-NIR*. Compact Hyperspectral Advanced Imager for Visible-NIR
- Fisher, J. (2013b). *Compact Hyperspectral Advanced Imager NIR*. <http://brandywinephotonics.com/wp-content/uploads/2014/02/RELEASE%20CHAI%20S-640-v3.pdf>
- Goetz, S.J., Bunn, A.G., Fiske, G.J., Houghton, R.A. Satellite-observed photosynthetic trends across boreal North America associated with climate and fire disturbance. *PNAS*, 2005, 102(38), 13521-13525. <https://doi.org/10.1073/pnas.050617910>.
- Grulke, N.; Maxfield, J.; Riggan, P.; Schrader-Patton, C. Pre-emptive detection of mature pine drought stress using multi-spectral aerial imagery. *Remote Sens.* 2020, 12, 14: 2338. <https://doi.org/10.3390/rs12142338>.
- HSFL *Hawaiisat-1*. <https://www.hsfl.hawaii.edu/missions/hawaiisat-1/> (accessed 25 May 2018)
- ITRES Research Limited (2010a). *MASI600*. <http://www.itres.com/wp-content/uploads/2014/10/MASI-600.pdf>
- ITRES Research Limited (2010b). *TASI600*. <http://www.itres.com/wp-content/uploads/2014/10/TASI-600.pdf>
- ITRES Research Limited (2012). *CASI1500h*. [http://www.itres.com/wp-content/uploads/2014/10/CASI\\_1500H1.pdf](http://www.itres.com/wp-content/uploads/2014/10/CASI_1500H1.pdf)
- ITRES Research Limited (2014). *SASI1000A*. [http://www.itres.com/wp-content/uploads/2014/10/SASI\\_1000A.pdf](http://www.itres.com/wp-content/uploads/2014/10/SASI_1000A.pdf)
- Lee, C.M., Cable, M.L., Hook, S.J., Green, R.O., Ustin, S.L., Mandl, D.J., & Middleton, E.M. (2015). An introduction to the NASA Hyperspectral InfraRed Imager (HyspIRI) mission and preparatory activities. *Remote Sensing of Environment*, 167, 6-19
- Liu, L., Yang, X., Gong, F., Su, Y., Huang, G., Chen, X. The novel microwave temperature vegetation drought index (Mtvdi) captures canopy seasonality across amazonian tropical evergreen forests. *Remote Sens.* 2021, 13(3), 339. <https://doi.org/10.3390/rs13030339>.
- Liu, L.; Wang, Y.; Wang, Z.; Li, D.; Zhang, Y.; Qin, D.; Li, S. Elevation-dependent decline in vegetation greening rate driven by increasing dryness based on three satellite NDVI datasets on the Tibetan Plateau. *Ecol. Indic.* 2019, 107, 105569. <https://doi.org/10.1016/j.ecolind.2019.105569>.
- Moore, G.W.; Edgar, C.B.; Vogel, J.G.; Washington-Allen, R.A.; March, R.G.; Zehnder, R. Tree mortality from an exceptional drought spanning mesic to semiarid ecoregions. *Ecol. Appl.* 2016, 26(2), 602-611. <https://doi.org/10.1890/15-0330>.
- MosaicMill Ltd (2017). *Rikola Hyperspectral camera*. [http://www.mosaicmill.com/products\\_other/hs\\_camera.html](http://www.mosaicmill.com/products_other/hs_camera.html) (accessed 30 May 2018)
- Müller, R., Bachmann, M., Chlebek, C., Krawczyk, H., Miguel, A., Palubinskas, G., Schneider, M., Schwind, P., Storch, T., Mogulsky, V., & Sang, B. (2012). The EnMAP Hyperspectral Satellite Mission. An Overview and Selected Concepts. In (pp. 39-44)
- NASA/JPL *HyspIRI Mission Study*. <https://hyspiri.jpl.nasa.gov/> (accessed 25 May 2018)
- Norsk Elektro Optikk AS *HySpex Hyperspectral Cameras*. <https://www.hyspex.no/products/> (accessed 30 May 2018)
- NRSC-ISRO *Earth Observation Missions*. [https://nrsc.gov.in/Earth\\_Observation\\_Missions](https://nrsc.gov.in/Earth_Observation_Missions) (accessed 25 May 2018)
- NRSCC (2017). *Chinese Carbon Dioxide Observation Satellite (TANSAT) Data Sharing*. <http://www.chinageoss.org/tansat/news/DataAccess.html> (accessed 30 May 2018)
- Photonfocus *Your application - Our solution*. <http://www.photonfocus.com/products/> (accessed 30 May 2018)
- Raddi, S., Giannetti, F., Martini, S., Farinella, F., Chirici, G., Tani, A., Maltoni, A., Mariotti, B., Monitoring drought response and chlorophyll content in Quercus by consumer-grade, near-infrared (NIR) camera: a comparison with reflectance spectroscopy. *New For.* 2021, 1-25. <https://doi.org/10.1007/s11056-021-09848-z>.

Rao, K.; Anderegg, W.R.; Sala, A.; Martínez-Vilalta, J.; Konings, A.G. Satellite-based vegetation optical depth as an indicator of drought-driven tree mortality. *Remote Sens. Environ.* 2019, 227, 125-136. <https://doi.org/10.1016/j.rse.2019.03.026>.

Resonon Inc *Hyperspectral Imaging Cameras*. <https://www.resonon.com/data-sheets/ResononHyperspectralCameras.Datasheet.pdf>

Rogers, B M.; Solvik, K.; Hogg, E.H.; Ju, J.; Masek, J.G.; Michaelian, M.; Berner, L. T.; Goetz, S.J. Detecting early warning signals of tree mortality in boreal North America using multiscale satellite data. *Glob. Change Biol.* 2018, 24(6), 2284-2304. <https://doi.org/10.1111/gcb.14107>.

Satellite Imaging Corp. (2007). *WorldView-3 Satellite Sensor*. <https://www.satimagingcorp.com/satellite-sensors/worldview-3/> (accessed 25 May 2018)

Satellogic *Satellogic Bringing Space Down to Earth*. <https://www.itu.int/en/ITU-R/space/workshops/2017-Bariloche/Presentations/30%20-%20Adrian%20Sinclair-%20Satellogic.pdf> (accessed 09 October 2018)

Specim *Airborne Hyperspectral Remote Sensing*. <http://www.specim.fi/hyperspectral-remote-sensing/> (accessed 30 May 2018)

Specim *Spectral Cameras*. <http://www.specim.fi/hyperspectral-cameras/> (accessed 30 May 2018)

Schwantes, A. M., Swenson, J. J., Jackson, R. B. Quantifying drought-induced tree mortality in the open canopy woodlands of central Texas. *Remote Sens. Environ.* 2016, 181, 54-64. <https://doi.org/10.1016/j.rse.2016.03.027>.

Symbios (2018). *The CEOS Database*. <http://database.eohandbook.com/> (accessed 25 May 2018)

Tadesse, T., Hollinger, D. Y., Bayissa, Y.A., Svoboda, M., Fuchs, B., Zhang, B., Demissie, G., Wardlow, B.D., Bohrer, G., Clark, K.L., Desai, A.R., Gu, L., Noormets, A., Novick, K.A., Richards, A. D. Forest Drought Response Index (ForDRI): a new combined model to monitor forest drought in the eastern United States. *Remote Sens.* 2020, 12(21), 3605. <https://doi.org/10.3390/rs12213605>.

USGS *Earth Observing 1 (EO-1)*. <https://eo1.usgs.gov/> (accessed 25 May 2018)

Van Mantgem, P.J., Stephenson, N.L. Apparent climatically induced increase of tree mortality rates in a temperate forest. *Ecol. Lett.* 2007, 10(10), 909-916. <https://doi.org/10.1111/j.1461-0248.2007.01080.x>.

Verbesselt, J.; Robinson, A.; Stone, C.; Culvenor, D. Forecasting tree mortality using change metrics derived from MODIS satellite data. *For. Ecol. Manag.* 2009, 258(7), 1166-1173. <https://doi.org/10.1016/j.foreco.2009.06.011>.

WMO (2011-2018). *OSCAR Observing Systems Capability Analysis and Review Tool*. <https://www.wmo-sat.info/oscar/> (accessed 25 May 2018)

Ximea (2018a). *MQ022HG-IM-LS100-NIR*. <https://www.ximea.com/en/products/hyperspectral-cameras-based-on-usb3-xispec/mq022hg-im-ls100-nir> (accessed 31 May 2018)

Ximea (2018b). *MQ022HG-IM-LS150-VISNIR*. <https://www.ximea.com/en/products/hyperspectral-cameras-based-on-usb3-xispec/mq022hg-im-ls150-visnir> (accessed 31 May 2018)
